# Supplementary material for: Auditory pre-experience modulates classification of affect intensity: evidence for the evaluation of call salience by a non-human mammal, the bat Megaderma lyra
Source: PubMed Central journal article supplement (PMC3866277; doi:10.1186/1742-9994-10-75), 2013-12-16
Supplement: 1742-9994-10-75-S1.pdf [file 1742-9994-10-75-S1.pdf]

## **ESM 1**

Spectral and temporal parameter values of synthesised response call syllables.

In total, we synthesised nine weak response call stimuli comprising nine u-shaped syllables (usy) and ten strong response call stimuli comprising 17 u-shaped syllables differing in peak frequency (peak freq [kHz]) of, duration (dur [ms]) of, and inter-pulse intervals (IPI [ms]) among, u-shaped syllables. Stimulus composition was based on the medians, and the lower and upper quartiles, of the parameter values given in Bastian and Schmidt [40].

Each stimulus (no. 1, 2, 3...) was composed by combining the parameter values of peak frequency (no. 1, 2, 3...), duration (no. 1, 2, 3...) and inter-pulse interval (no. 1, 2, 3...) of the respective column.

| weak response call stimuli |                 |          |          |          |          |                 |          |          |          |          |                 |          |          |          |          |
|----------------------------|-----------------|----------|----------|----------|----------|-----------------|----------|----------|----------|----------|-----------------|----------|----------|----------|----------|
| stimulus no.               | 1, 2, 3         | 1, 2, 3  | 1        | 2        | 3        | 4, 5, 6         | 4, 5, 6  | 4        | 5        | 6        | 7, 8, 9         | 7, 8, 9  | 7        | 8        | 9        |
| usy no.                    | peak freq [kHz] | dur [ms] | IPI [ms] | IPI [ms] | IPI [ms] | peak freq [kHz] | dur [ms] | IPI [ms] | IPI [ms] | IPI [ms] | peak freq [kHz] | dur [ms] | IPI [ms] | IPI [ms] | IPI [ms] |
| 1                          | 17.7            | 4.05     | 7.71     | 6.46     | 4.98     | 17.7            | 4.03     | 7.75     | 6.55     | 5        | 18.2            | 4        | 7.72     | 6.57     | 5.04     |
| 2                          | 18.2            | 3.74     | 7.71     | 6.47     | 5        | 18.4            | 3.73     | 7.86     | 6.64     | 4.96     | 19.1            | 3.73     | 7.77     | 6.55     | 5.03     |
| 3                          | 19.1            | 2.57     | 7.71     | 6.5      | 5.01     | 20.2            | 2.58     | 7.75     | 6.53     | 5.03     | 20.6            | 2.56     | 7.71     | 6.5      | 5        |
| 4                          | 19.3            | 2.71     | 7.6      | 6.4      | 4.89     | 19.7            | 2.71     | 7.68     | 6.47     | 4.99     | 20              | 2.69     | 7.75     | 6.57     | 5.04     |
| 5                          | 18.9            | 2.99     | 7.68     | 6.44     | 4.96     | 18.9            | 3.02     | 7.65     | 6.42     | 4.93     | 19.3            | 2.99     | 7.7      | 6.51     | 4.97     |
| 6                          | 18              | 3.4      | 7.67     | 6.45     | 4.84     | 18.4            | 3.44     | 7.63     | 6.41     | 4.96     | 18.6            | 3.42     | 7.76     | 6.55     | 4.99     |
| 7                          | 17.5            | 2.99     | 7.71     | 6.47     | 4.89     | 18              | 3        | 7.67     | 6.45     | 4.96     | 17.7            | 3.02     | 7.72     | 6.53     | 4.98     |
| 8                          | 17.5            | 2.96     | 7.68     | 6.43     | 4.84     | 17.1            | 2.98     | 7.74     | 6.52     | 5.02     | 17.5            | 2.96     | 7.64     | 6.43     | 9.96     |
| 9                          | 17.2            | 3.07     | -        | -        | -        | 17.2            | 3.1      | -        | -        | -        | 17.3            | 3.1      | -        | -        | -        |

| strong response call stimuli |                 |          |          |          |          |                 |                 |             |          |          |          |                 |          |          |          |          |
|------------------------------|-----------------|----------|----------|----------|----------|-----------------|-----------------|-------------|----------|----------|----------|-----------------|----------|----------|----------|----------|
| stimulus no.                 | 1, 2, 3         | 1, 2, 3  | 1        | 2        | 3        | 4, 5, 6         | 10              | 4, 5, 6, 10 | 4        | 5, 10    | 6        | 7, 8, 9         | 7, 8, 9  | 7        | 8        | 9        |
| usy no.                      | peak freq [kHz] | dur [ms] | IPI [ms] | IPI [ms] | IPI [ms] | peak freq [kHz] | peak freq [kHz] | dur [ms]    | IPI [ms] | IPI [ms] | IPI [ms] | peak freq [kHz] | dur [ms] | IPI [ms] | IPI [ms] | IPI [ms] |
| 1                            | 18              | 2.67     | 6.23     | 4.88     | 3.66     | 18.5            | 12              | 2.66        | 6.12     | 4.88     | 3.64     | 20.1            | 2.69     | 6.15     | 4.89     | 3.65     |
| 2                            | 19.2            | 3.4      | 6.23     | 4.83     | 3.66     | 19.8            | 13.1            | 3.4         | 6.11     | 4.91     | 3.64     | 20.8            | 3.36     | 6.16     | 4.89     | 3.67     |
| 3                            | 20              | 3.73     | 6.29     | 4.94     | 3.73     | 21              | 15              | 3.73        | 6.19     | 4.91     | 3.71     | 22              | 3.71     | 6.08     | 4.8      | 3.6      |
| 4                            | 19.5            | 3.75     | 6.25     | 4.92     | 3.71     | 20.2            | 14.7            | 3.77        | 6.09     | 4.89     | 3.59     | 21.6            | 3.77     | 6.18     | 4.88     | 3.62     |
| 5                            | 19.9            | 3.25     | 6.23     | 4.9      | 3.67     | 20.4            | 14.7            | 3.28        | 6.08     | 4.88     | 3.63     | 21.7            | 3.25     | 6.2      | 4.93     | 3.71     |
| 6                            | 19.9            | 3.48     | 6.29     | 4.94     | 3.74     | 20.8            | 14.8            | 3.47        | 6.3      | 4.79     | 3.81     | 21.9            | 3.46     | 6.13     | 4.87     | 3.64     |
| 7                            | 19.7            | 3.26     | 6.25     | 4.92     | 3.7      | 20.6            | 14              | 3.25        | 6.16     | 4.83     | 3.67     | 21.6            | 3.24     | 6.13     | 4.87     | 3.62     |
| 8                            | 19.3            | 3.9      | 6.27     | 4.92     | 3.71     | 19.9            | 13.9            | 3.92        | 6.17     | 4.88     | 3.69     | 21              | 3.88     | 6.2      | 4.94     | 3.71     |
| 9                            | 18.9            | 3.01     | 6.25     | 4.91     | 3.69     | 19.7            | 13.7            | 3.01        | 6.14     | 4.88     | 3.65     | 20.8            | 3.02     | 6.14     | 4.89     | 3.64     |
| 10                           | 18.2            | 3.75     | 6.21     | 4.83     | 3.62     | 19.1            | 13              | 3.73        | 6.26     | 4.83     | 3.77     | 20.2            | 3.73     | 6.21     | 4.95     | 3.71     |
| 11                           | 18.1            | 3.81     | 6.25     | 4.88     | 3.69     | 18.7            | 13.1            | 3.83        | 6.18     | 4.84     | 3.71     | 20.2            | 3.81     | 6.18     | 4.92     | 3.67     |
| 12                           | 17.7            | 4.29     | 6.24     | 4.88     | 3.67     | 18.2            | 12.4            | 4.29        | 6.17     | 4.94     | 3.65     | 19.5            | 4.26     | 6.13     | 4.86     | 3.6      |
| 13                           | 17.7            | 4.01     | 6.3      | 4.96     | 3.74     | 18              | 12              | 4.04        | 6.09     | 4.89     | 3.61     | 19.5            | 4.01     | 6.12     | 4.84     | 3.62     |
| 14                           | 17.3            | 4.05     | 6.25     | 4.88     | 3.67     | 17.6            | 11.9            | 4.05        | 6.17     | 4.87     | 3.69     | 18.7            | 4.06     | 6.22     | 4.92     | 3.73     |
| 15                           | 17.1            | 3.75     | 6.27     | 4.92     | 3.71     | 17.7            | 11.3            | 3.76        | 6.19     | 4.88     | 3.69     | 18.9            | 3.76     | 6.17     | 4.88     | 3.69     |
| 16                           | 16.6            | 3.06     | 6.2      | 4.86     | 3.67     | 17.2            | 10.7            | 3.06        | 6.17     | 4.92     | 3.67     | 17.8            | 3.09     | 6.16     | 4.86     | 3.65     |
| 17                           | 16.1            | 3.45     | -        | -        | -        | 16.9            | 10.4            | 3.48        | -        | -        | -        | 17.7            | 3.46     | -        | -        | -        |

Title: Auditory pre-experience modulates classification of affect intensity: evidence for the evaluation of call salience by a non-human mammal, the bat *Megaderma lyra*

Journal name: BMC Biology

Authors: Hanna B Kastein<sup>1</sup>, AK Vinoth Kumar<sup>2</sup>, Sripathi Kandula<sup>2</sup> and Sabine Schmidt<sup>1</sup>

<sup>1</sup>Institute of Zoology, University of Veterinary Medicine Hannover Foundation

Bünteweg 17, 30559 Hannover, Germany

<sup>2</sup>School of Biological Sciences, Madurai Kamaraj University

625021 Madurai, India

e-mail: [sabine.schmidt@tiho-hannover.de](mailto:sabine.schmidt@tiho-hannover.de)
